# Supplementary material
Source: PubMed Central journal article supplement (PMC4457947)
Supplement: mmc1.pdf [file mmc1.pdf]

The American Journal of Human Genetics

Supplemental Data

**Homozygosity for Frameshift Mutations in *XYLT2*  
Result in a Spondylo-Ocular Syndrome  
with Bone Fragility, Cataracts, and Hearing Defects**

Craig F. Munns, Somayyeh Fahiminiya, Nabin Poudel, Maria Cristina Munteanu, Jacek Majewski, David O. Sillence, Jordan P. Metcalf, Andrew Biggin, Francis Glorieux, François Fassier, Frank Rauch, and Myron E. Hinsdale

## Supplemental Data and Methods

| <b>Table S1</b>                                                                                                          |        |        |        |      |
|--------------------------------------------------------------------------------------------------------------------------|--------|--------|--------|------|
| <b>Comparison between patients Ind. 1, Ind. 2 and Spondylo-Ocular syndrome (Schmidt <i>et al.</i>, 2001)<sup>1</sup></b> |        |        |        |      |
|                                                                                                                          | Ind. 1 | Ind. 2 | Ind. 3 | SOS  |
| Normal height                                                                                                            | +      | +      | +      | +    |
| Vertebral compression fractures                                                                                          | +      | +      | +      | +    |
| Long-bone fractures                                                                                                      | +      | +      | +      | -    |
| Flat feet                                                                                                                | +      | +      | +      | +    |
| Cataract                                                                                                                 | +      | +      | +      | +    |
| Retinal detachment                                                                                                       | +      | -      | +      | +    |
| Heart defect                                                                                                             | +      | +      | n.r.   | +/-  |
| Hearing loss                                                                                                             | +      | +      | +      | -    |
| Ureter dilatation                                                                                                        | +      | +      | n.r.   | n.r. |

n.r., not reported. Ind.1, individual 1; Ind. 2, individual 2

| <b>Table S2</b>                                              |                            |                               |                       |
|--------------------------------------------------------------|----------------------------|-------------------------------|-----------------------|
| <b>RT-PCR primers and accession numbers for gene targets</b> |                            |                               |                       |
| Gene                                                         | Forward Primer             | Reverse primer                | NCBI Accession number |
| <i>XYLT1</i>                                                 | ACCGAGATATGAATTTCTTGAAGTCA | AGGCCCTGCTTCCGAATG            | NM_022166             |
| <i>XYLT2</i>                                                 | GGGTGAGACCCGCTTCCT         | GCATCATCTTTCCTGAGAGGTAG<br>TT | NM_022167             |
| <i>GALT7</i>                                                 | TGACAAGACCGCCACACC         | GTCCTGAGCCTGAGCAATATG         | NM_007255             |
| <i>GALT6</i>                                                 | CCTAGGTCAGGCCGTTGAGTT      | GCGGTCAGTCCTGGATTCA           | NM_080605             |
| <i>GAT3A</i>                                                 | GCCAACTGCACTCGGGTACT       | CCTGCTTCATCTTGGGCTTCT         | NM_012200             |

**Supplemental Table S2.** Many primer sets are available from Origene. Comparative gene expression was determined using  $2^{-\Delta\Delta Ct}$  method<sup>2</sup>.

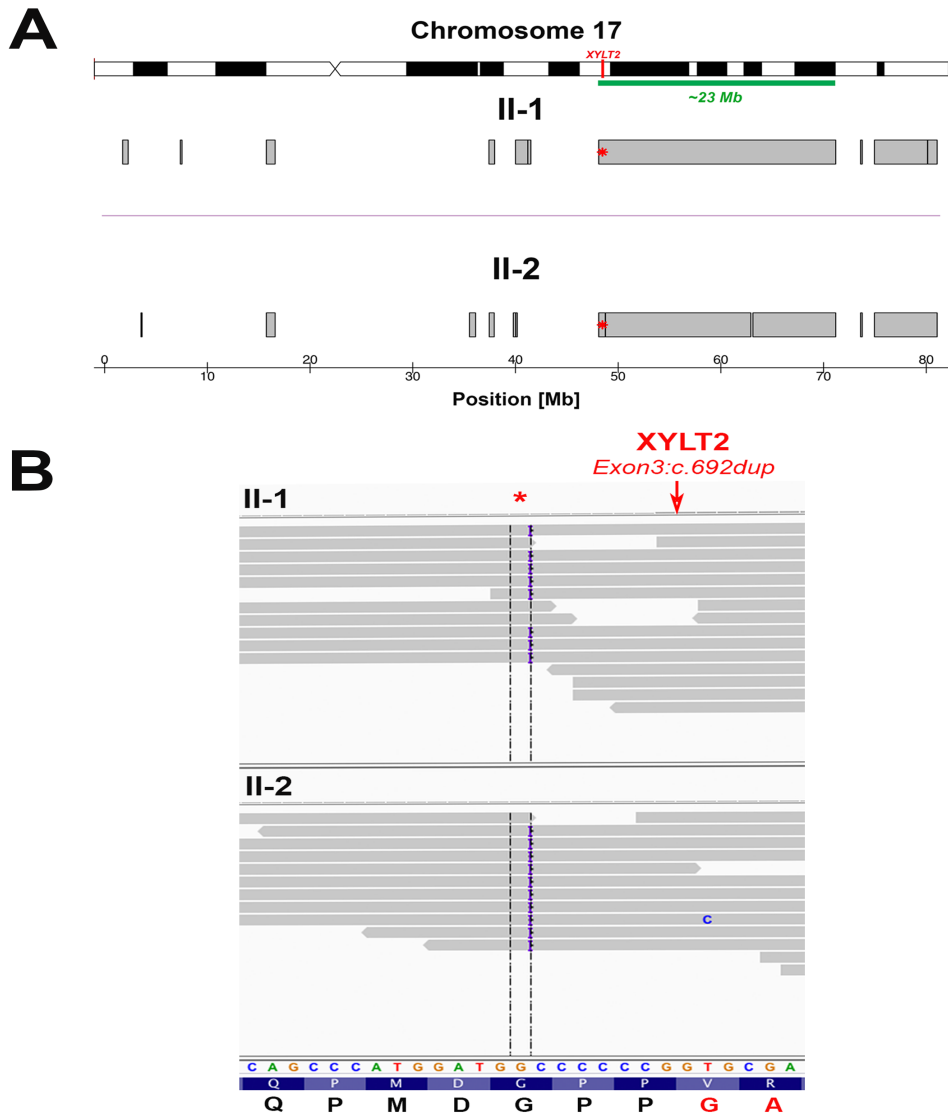

**Figure S1:** A) The gray bars show the location of the region of homozygosity on chromosome 17 for individuals 1 (II-1) and 2 (II-2). The ~23Mb shared region of homozygosity surrounding *XYLT2* is indicated with the green bar. *XYLT2* is located on chromosome 17 and in both individuals harbour a homozygous mutation at genomic position 4,843,186 (highlighted by a red asterisk). B) The IGV snapshot shows the position of the homozygous single-nucleotide duplication in *XYLT2* (NM\_022167: c.692dup)(red arrow) that is shared by the two patients. The gray bars are 100 bp paired-end reads that mapped to the human reference genome (hg19) using BWA aligner. The insertion introduces a stop codon 54 residues downstream (p.Val232Glyfs\*54) as shown in supplemental figure S2 below. In the lower part of figure, the reference DNA sequence, the reference protein sequence (two shades of blue) and protein predicted from variant coding sequence are illustrated where the variant sequence is in red.

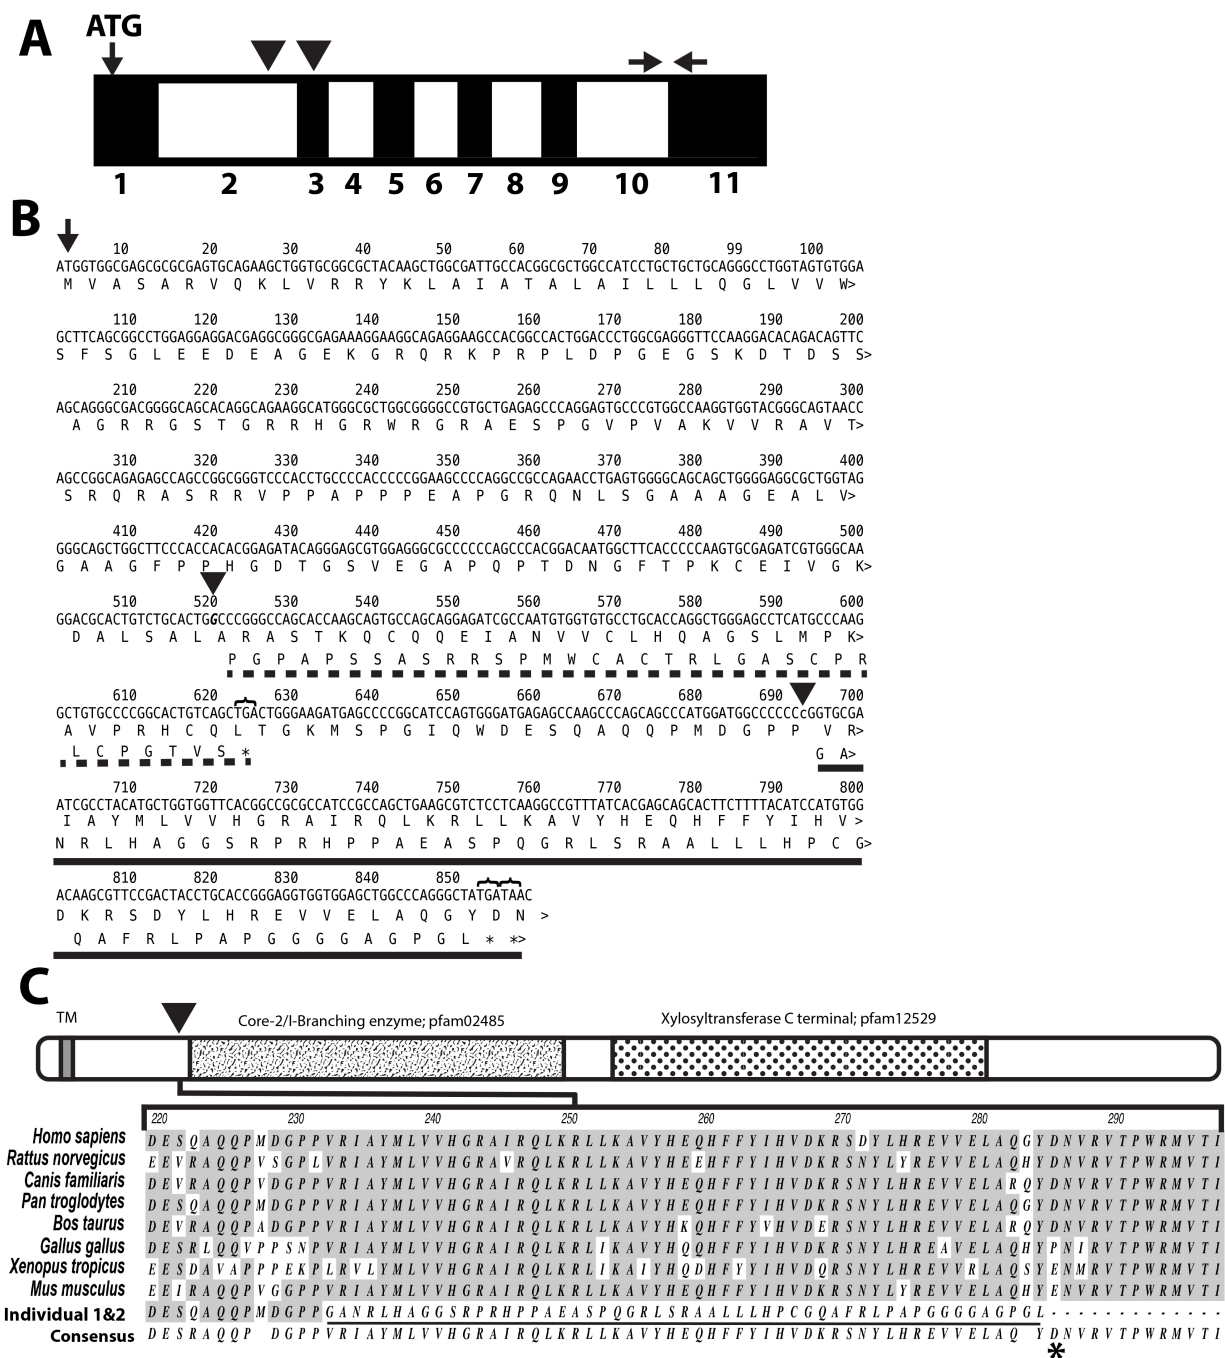

**Figure S2.** A) Alternating black and white boxes with indicated numbers indicate exons within the cDNA with exon 1 being black. Translational initiation codon ATG is indicated. First black arrowhead indicates site of individual 3 mutation. Second arrowhead is shared mutation in individuals 1 and 2. Black horizontal arrows are real-time PCR primers using for expression analyses B) Normal cDNA sequence with translation. Translational initiation codon ATG indicated by the black arrow. First black arrowhead indicates guanine deletion with bolded base in individual 3. Top amino acid sequence is wildtype. Dotted line underlines amino acid sequence of individual 3 with new amino acids due to the frame shift and asterisk/bracket is premature translational termination. Second arrowhead is cytosine duplication in individuals 1 and 2. Black bar indicates start of aberrant protein sequence ending in two stop codons indicated by asterisk/brackets. C) Diagram shows known domain structure of XylT2. Transmembrane domain, TM, is shown in N-terminal region. Arrowhead shows location of insertion and frame shift and dotted domain, pfam 12529, shows predicted catalytic domain. Underlined amino acids are novel non-conserved 53 residues due to frame shift mutation and asterisk is premature translational termination in individuals 1 and 2.

| Table S3                     | Genomic Position hg19   |                  |                  |                  |                  |
|------------------------------|-------------------------|------------------|------------------|------------------|------------------|
|                              | chr17:48431826          | chr17:61902289   | chr17:79225239   | chr17:80136979   | chrX:19725093    |
| Consequence                  | frameshift insertion    | Missense variant | Missense variant | Missense variant | Missense variant |
| Reference allele             | GCCCCCC                 | C                | G                | C                | C                |
| Alternative allele           | GCCCCCCC                | A                | A                | T                | T                |
| Individual-1                 | Hom                     | Hom              | Hom              | Hom              | Hom              |
| Individual-2                 | Hom                     | Hom              | Hom              | Hom              | Hom              |
| BioType of transcript        | Nonsense mediated_decay | Protein coding   | Protein coding   | Protein coding   | Protein coding   |
| Locus Accession Number       | NM_022167               | NM_017647        | NM_138570        | NM_198082        | NM_001024666     |
| cDNA Change                  | c.692_693insC           | c.712G>T         | c.2119C>T        | c.1298G>A        | c.185G>A         |
| Protein Change               | p.P231fs                | p.A238S          | p.L707F          | p.R433H          | p.R62Q           |
| Gene name                    | <i>XYLT2</i>            | <i>FTSJ3</i>     | <i>SLC38A10</i>  | <i>CCDC57</i>    | <i>SH3KBP1</i>   |
| #prev seen in-house database | 0                       | 0                | 1                | 3                | 0                |
| dbSNP: rsID                  | -                       | 0                | rs200011449      | rs200450321      | -                |
| MAF from 1000 genomes        | 0                       | 0                | 0                | 0                | 0                |
| EVS MAF                      | 0                       | 0                | 0.0012           | 0.001107         | 0                |
| ExAC MAF                     | 0                       | 0                | 0.001504         | 0.0007           | 0.000008         |
| SIFT score                   |                         | 0.02             | 0.13             | 0                | 0.03             |
| Polyphen2 score              |                         | 0.928            | 0                | 0.715            | 0.105            |
| Mutation Taster prediction   |                         | Disease Causing  | Polymorphism     | Disease causing  | Disease causing  |
|                              |                         |                  |                  |                  |                  |

**Table S3.** Frameshift and missense variants of candidate loci. Whole exome sequencing was performed on 3 µg of genomic DNA of each individual at Genome Quebec Innovation Center, Montreal, Canada. Briefly, exonic sequences were captured using the SureSelect Human Exome Kit V.4 (Agilent Technologies, Inc., Santa Clara, CA). Enriched libraries were then sequenced on Illumina Hiseq 2000 sequencer, generating 100 base pair paired-end reads for each sample. The bioinformatic analysis of exome sequencing data was carried out as previously described<sup>3;4</sup>. In brief, mapping reads against the human reference genome (hg19), local realignment around small insertions or deletions (indels), depth of coverage calculation and the reads duplication removal were performed using the BWA (v. 0.5.9)<sup>5</sup>, Genome Analysis Toolkit<sup>6</sup> and Picard tools (<http://picard.sourceforge.net>), respectively. The mean read depth for the consensus-coding sequence was 99X (II-1) and 122X (II-2), and 95% of bases were covered by ≥10 reads. The genetic variations (SNVs and indels) were detected using Samtools (v. 0.1.17)<sup>7</sup> and mpileup and were annotated with an in-house annotation pipeline that uses ANNOVAR and custom scripts. The potential damaging effect of variants was predicted using SIFT [18], PolyPhen-2 [19], MutationTaster [20]. To differentiate novel variants from common polymorphisms and sequencing artifacts, exonic (frameshift indels, nonsense, missense) and canonical splice site variants with minor allele frequency of more than 1% in public databases (1000Genomes or in the Exome Variant Server [EVS]) or seen in >10 individuals in our in-house exome database were filtered out. Candidate genes having shared homozygous mutations between the patients were selected and were manually examined using the Integrative Genomics Viewer (IGV)<sup>8</sup>. All loci from index patients and parents were confirmed to be in the *XYLT2* gene by Sanger sequencing of *XYLT2* exon 3 amplification by polymerase chain reaction followed by direct sequencing using an Applied Biosystems 3730xl sequencer (Applied Biosystems, Foster City, CA, USA). Sequence traces were aligned with GenBank reference sequence NM\_022167.2.

**References:**

1. Schmidt, H., Rudolph, G., Hergersberg, M., Schneider, K., Moradi, S., and Meitinger, T. (2001). Retinal detachment and cataract, facial dysmorphism, generalized osteoporosis, immobile spine and platyspondyly in a consanguinous kindred--a possible new syndrome. *Clin Genet* 59, 99-105.
2. Livak, K.J., and Schmittgen, T.D. (2001). Analysis of relative gene expression data using real-time quantitative PCR and the 2(-Delta Delta C(T)) Method. *Methods* 25, 402-408.
3. Fahiminiya, S., Majewski, J., Mort, J., Moffatt, P., Glorieux, F.H., and Rauch, F. (2013). Mutations in WNT1 are a cause of osteogenesis imperfecta. *J Med Genet*.
4. Fahiminiya, S., Al-Jallad, H., Majewski, J., Palomo, T., Moffatt, P., Roschger, P., Klaushofer, K., Glorieux, F.H., and Rauch, F. (2014). A Polyadenylation Site Variant Causes Transcript-Specific BMP1 Deficiency and Frequent Fractures in Children. *Hum Mol Genet*.
5. Li, H., and Durbin, R. (2009). Fast and accurate short read alignment with Burrows-Wheeler transform. *Bioinformatics* 25, 1754-1760.
6. McKenna, A., Hanna, M., Banks, E., Sivachenko, A., Cibulskis, K., Kernytsky, A., Garimella, K., Altshuler, D., Gabriel, S., Daly, M., et al. (2010). The Genome Analysis Toolkit: a MapReduce framework for analyzing next-generation DNA sequencing data. *Genome Res* 20, 1297-1303.
7. Li, H., Handsaker, B., Wysoker, A., Fennell, T., Ruan, J., Homer, N., Marth, G., Abecasis, G., and Durbin, R. (2009). The Sequence Alignment/Map format and SAMtools. *Bioinformatics* 25, 2078-2079.
8. Robinson, J.T., Thorvaldsdottir, H., Winckler, W., Guttman, M., Lander, E.S., Getz, G., and Mesirov, J.P. (2011). Integrative genomics viewer. *Nat Biotechnol* 29, 24-26.
